# Supplementary material for: Prognostic Value of Early Postoperative Troponin T in Patients Undergoing Coronary Artery Bypass Grafting
Source: PubMed Central journal article supplement — J Am Heart Assoc. 2018 Feb 27;7(5):e007743. doi: 10.1161/JAHA.117.007743 (PMC5866325; doi:10.1161/jaha.117.007743), 2018-02-27
Supplement: JAH3-7-e007743-s001.pdf [file JAH3-7-e007743-s001.pdf]

# **Supplemental Material**

**Table S1.** Estimated probabilities of MACCE and the safety composite for specific cTnT levels in increments of 200 ng/L, stratified by conventional versus high sensitivity cardiac Troponin T.

| Cut-off (ng/L) | Risk of MACCE (95% CI) |                     | Risk of Safety composite (95% CI) |                     |
|----------------|------------------------|---------------------|-----------------------------------|---------------------|
|                | Conventional           | High sensitivity    | Conventional                      | High sensitivity    |
| 200            | 10.3 (8.1 to 12.9)     | 3.5 (2.4 to 5.1)    | 18.6 (15.9 to 21.7)               | 6.0 (4.4 to 8.1)    |
| 400            | 19.7 (16.1 to 23.9)    | 11.3 (9.3 to 13.8)  | 28.3 (24.0 to 32.9)               | 16.3 (13.9 to 19.0) |
| 600            | 27.7 (22.0 to 34.3)    | 20.9 (17.4 to 24.8) | 35.2 (29.0 to 41.8)               | 27.2 (23.2 to 31.5) |
| 800            | 34.8 (27.1 to 43.7)    | 30.8 (25.2 to 37.0) | 40.7 (33.0 to 49.0)               | 37.2 (31.3 to 43.6) |
| 1000           | 40.6 (30.9 to 51.1)    | 40.0 (32.2 to 48.3) | 45.1 (35.8 to 54.6)               | 45.9 (38.1 to 53.9) |
| 1200           | 45.0 (33.9 to 56.5)    | 48.1 (38.5 to 57.8) | 48.2 (38.0 to 58.6)               | 53.2 (44.0 to 62.2) |
| 1400           | 49.2 (36.9 to 61.6)    | 55.0 (44.1 to 65.5) | 51.2 (40.1 to 62.2)               | 59.3 (49.0 to 68.8) |

CI, confidence interval.

**Table S2.** Association of logistic EuroSCORE, cardiac Troponin T and need for vasopressors with MACCE and safety composite

|                                    | MACCE             |                   | Safety composite |                  |
|------------------------------------|-------------------|-------------------|------------------|------------------|
|                                    | OR (95% CI)       |                   | OR (95% CI)      |                  |
|                                    | univariable       | multivariable     | univariable      | multivariable    |
| <b>Conventional Troponin T</b>     |                   |                   |                  |                  |
| Logistic EuroSCORE                 | 2.3 (1.5 to 3.6)  | 1.6 (1.0 to 2.6)  | 3.1 (2.2 to 4.4) | 2.5 (1.7 to 3.7) |
| Troponin T                         | 6.1 (3.8 to 9.8)  | 5.3 (3.3 to 8.6)  | 3.7 (2.5 to 5.4) | 3.1 (2.1 to 4.6) |
| Vasopressors                       | 1.9 (1.2 to 3.0)  | 1.4 (0.8 to 2.4)  | 2.0 (1.3 to 2.9) | 1.4 (0.9 to 2.2) |
| <b>High sensitivity Troponin T</b> |                   |                   |                  |                  |
| Logistic EuroSCORE                 | 1.4 (1.0 to 2.1)  | 1.2 (0.8 to 1.8)  | 2.1 (1.5 to 2.9) | 1.9 (1.3 to 2.8) |
| Troponin T                         | 8.1 (5.2 to 12.5) | 7.9 (5.1 to 12.3) | 6.7 (4.5 to 9.9) | 6.5 (4.4 to 9.6) |
| Vasopressors                       | 1.2 (0.8 to 1.9)  | 1.0 (0.6 to 1.5)  | 1.4 (1.0 to 2.0) | 1.1 (0.7 to 1.6) |

OR: odds ratio; CI: confidence interval

'Vasopressors' indicates the need for vasopressors or inotropes within the first 6 hours after surgery. Multivariable analysis included all 3 predictor variables. Odds ratios for logistic EuroSCORE and Troponin T are expressed per 2 standard deviations after log transformation and can be interpreted similar to the ORs of categorical variables.

**Table S3.** Comparison of observed and predicted probabilities.

|                             | Observed probability (95% CI) |               | Predicted probability (95% CI) |               |
|-----------------------------|-------------------------------|---------------|--------------------------------|---------------|
|                             | ≤ 800 ng/L                    | >800 ng/L     | ≤ 800 ng/L                     | >800 ng/L     |
| MACCE                       |                               |               |                                |               |
| Conventional Troponin T     | 11 (8 to 13)                  | 47 (30 to 65) | 10 (4 to 52)                   | 51 (33 to 64) |
| High sensitivity Troponin T | 8 (7 to 10)                   | 53 (41 to 65) | 9 (5 to 43)                    | 48 (35 to 59) |
| Safety composite            |                               |               |                                |               |
| Conventional Troponin T     | 17 (15 to 20)                 | 68 (49 to 83) | 17 (7 to 55)                   | 67 (49 to 74) |
| High sensitivity Troponin T | 12 (10 to 14)                 | 62 (50 to 73) | 13 (7 to 45)                   | 57 (44 to 65) |

**Table S4.** Association of pre- and post-operative cardiac Troponin T with MACCE.

|                                 | OR (95% CI)         | P      |
|---------------------------------|---------------------|--------|
| Conventional Troponin T         |                     |        |
| Pre-operative                   | 1.26 (.874 to 1.82) | 0.22   |
| Early post-operative, crude     | 2.96 (2.23 to 3.95) | <0.001 |
| Early post-operative, adjusted* | 3.32 (1.50 to 6.98) | 0.003  |
| High sensitivity Troponin T     |                     |        |
| Pre-operative                   | 1.00 (.763 to 1.31) | 1.00   |
| Early post-operative, crude     | 5.79 (4.02 to 8.33) | <0.001 |
| Early post-operative, adjusted* | 7.78 (3.62 to 16.7) | <0.001 |

\*For pre-operative cTnT

**Figure S1.** Distribution of early cardiac Troponin T and probability of safety composite.

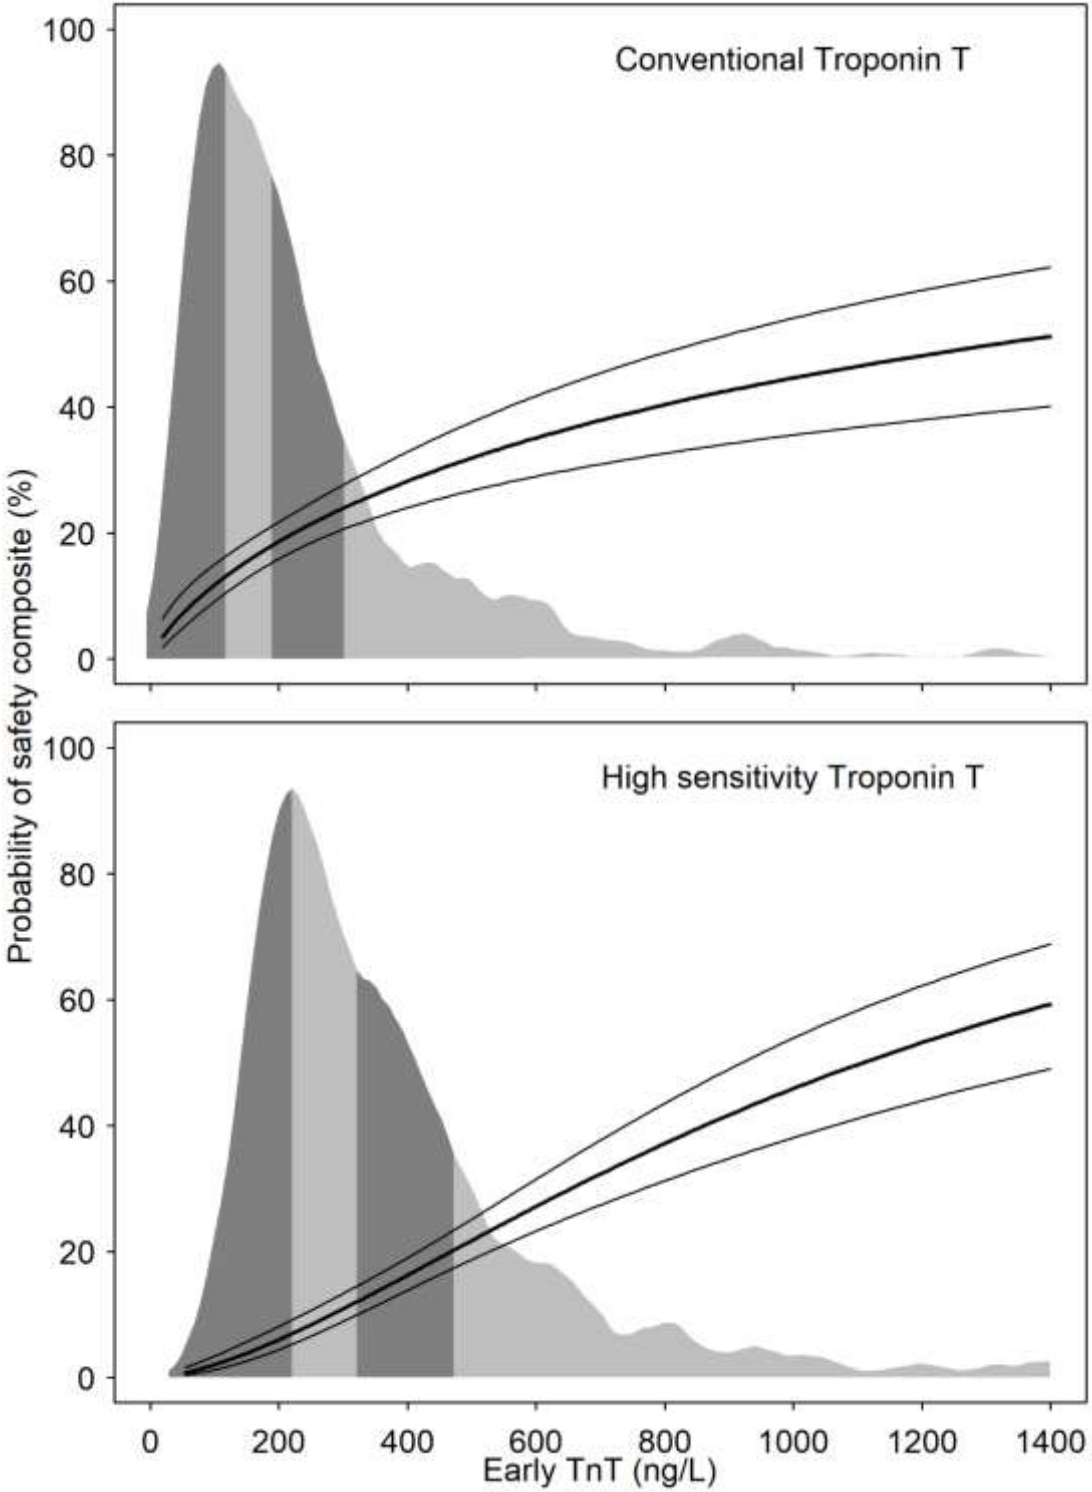

Risk of in-house safety composite, shaded region represents the distribution of conventional or high sensitivity cTnT, respectively, measured 9 hours after CABG surgery.
